# Supplementary material for: Pottery glaze-derived sintering aids for the synthesis of NASICON electrolytes with high ionic conductivity and relative density
Source: Royal Society of Chemistry journal article supplement (doi:10.1039/d4ta05865h), 2024-01-01
Supplement: d4ta05865h1.pdf [file d4ta05865h1.pdf]

## Electronic supplementary information

### **Pottery Glaze-Derived Sintering Aid for the Synthesis of NASICON Electrolyte with High Ionic Conductivity and Relative Density**

Il-Seop Jang,<sup>‡ab</sup> Gunhee Park,<sup>‡ab</sup> Bo-Ye Song,<sup>ab</sup> Wooseok Go,<sup>c</sup> Byeong-Jun Ahn,<sup>ab</sup> Yun Chan Kang<sup>\*b</sup> and Jinyoung Chun<sup>\*a</sup>

*<sup>a</sup>Emerging Materials R&D Division, Korea Institute of Ceramic Engineering and Technology (KICET), Jinju, Gyeongnam 52851, Republic of Korea. E-mail: jchun@kicet.re.kr*

*<sup>b</sup>Department of Materials Science and Engineering, Korea University, Seoul 02841, Republic of Korea. E-mail: yckang@korea.ac.kr*

*<sup>c</sup>Energy Storage and Distributed Resources Division, Lawrence Berkeley National Laboratory, Berkeley, CA 94720, USA*

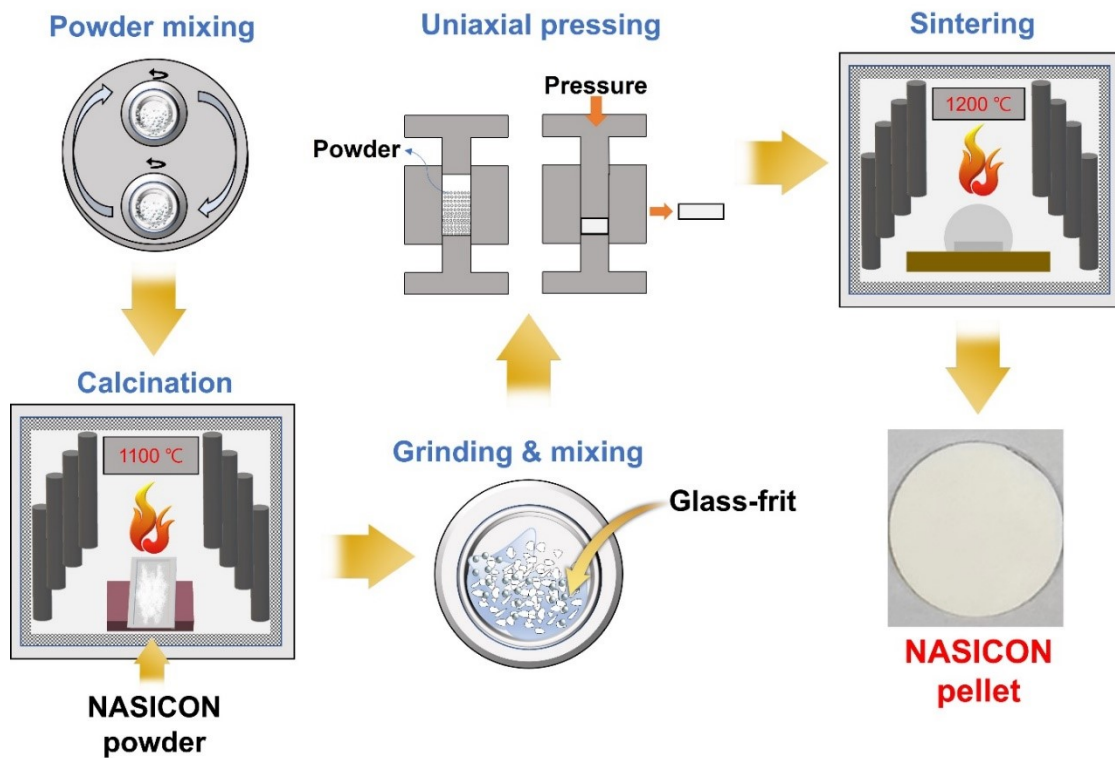

Fig. S1. Schematic of the synthesis process for vA-NASICON pellets with glass frit additive.

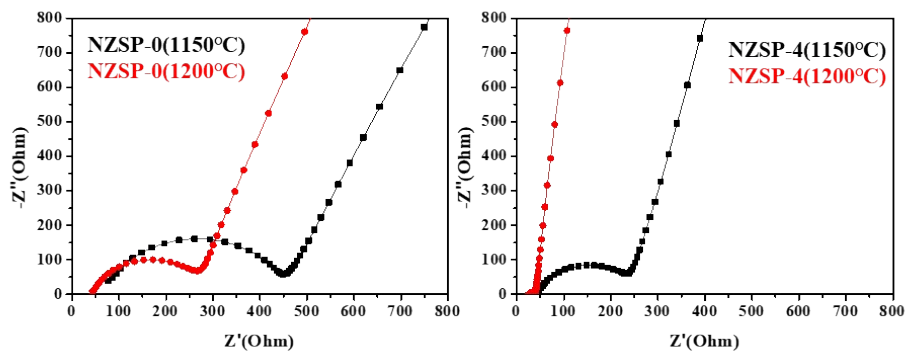

|                   | Conductivity at RT[S cm <sup>-1</sup> ] | Density[g/cm <sup>3</sup> ] | Relative density(%) |
|-------------------|-----------------------------------------|-----------------------------|---------------------|
| Frit 0wt%(1150°C) | 2.4 x 10 <sup>-4</sup> S/cm             | 2.18g/cm <sup>3</sup>       | 66.7                |
| Frit 4wt%(1150°C) | 5.5 x 10 <sup>-4</sup> S/cm             | 3.10g/cm <sup>3</sup>       | 94.8                |
| Frit 0wt%(1200°C) | 4.0 x 10 <sup>-4</sup> S/cm             | 2.61g/cm <sup>3</sup>       | 79.8                |
| Frit 4wt%(1200°C) | 2.3 x 10 <sup>-3</sup> S/cm             | 3.22g/cm <sup>3</sup>       | 98.4                |

Fig. S2. Comparison of Nyquist plots, ionic conductivities, densities, and relative densities of NZSP-0 and NZSP-4 at 1150 °C and 1200 °C.

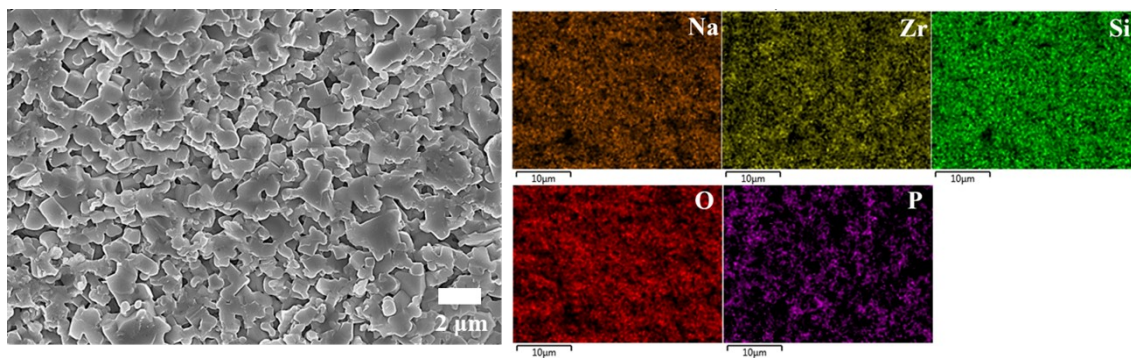

**Fig. S3.** Cross-section FE-SEM image and EDS mappings of NZSP-0.

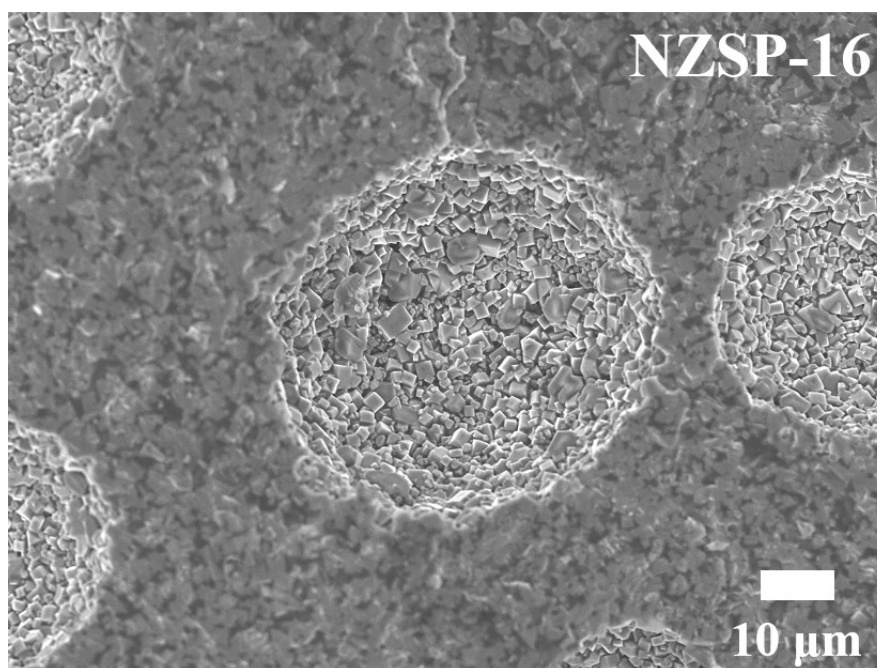

**Fig. S4.** Cross-section FE-SEM image of NZSP-16.

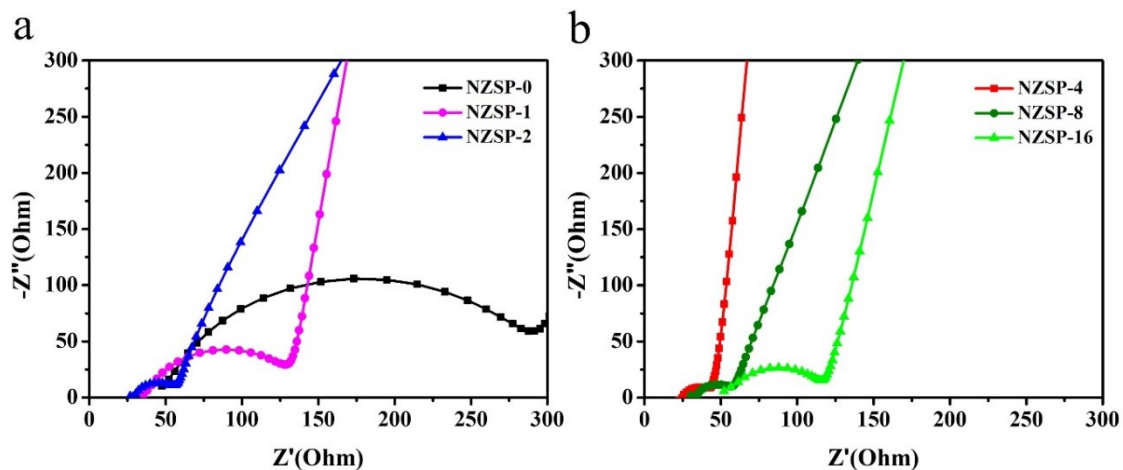

Fig. S5. Nyquist plots of (a) NZSP-0, NZSP-1, and NZSP-2, and (b) NZSP-4, NZSP-8, and NZSP-16.

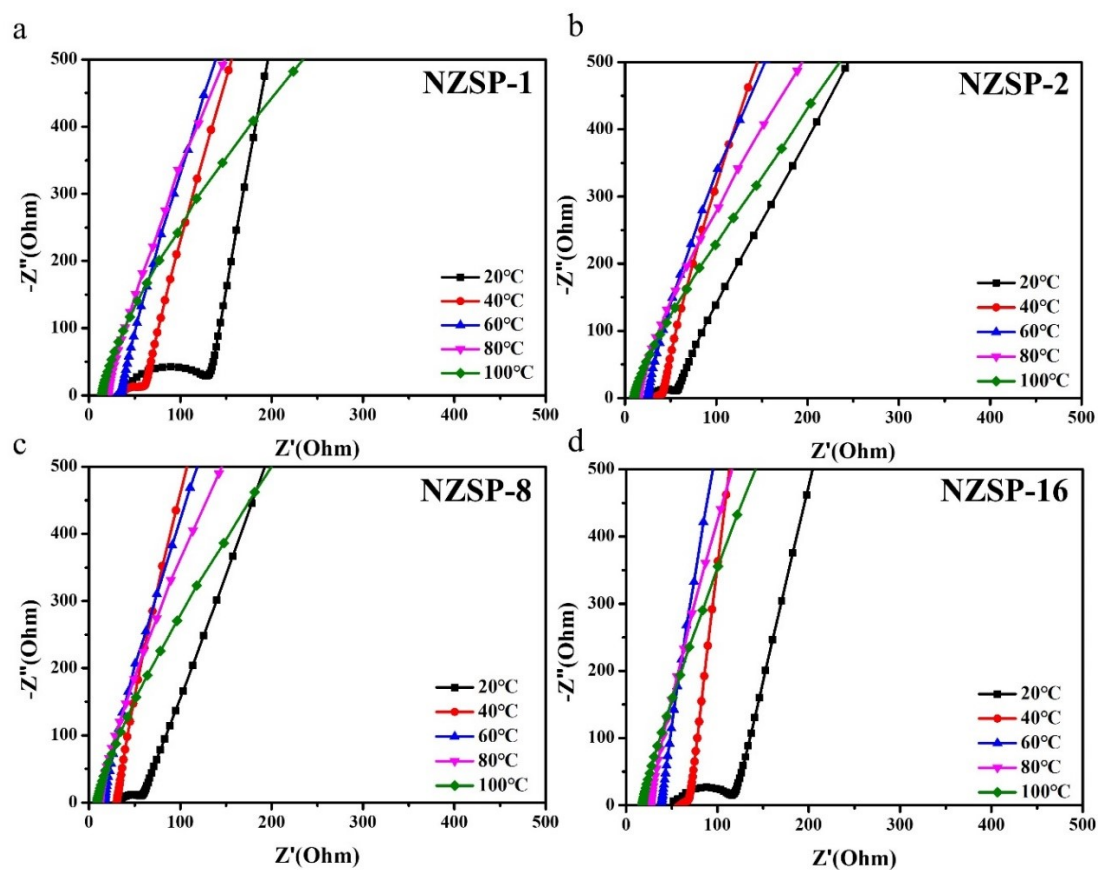

Fig. S6. Nyquist plots of NZSP-x in the temperature range of 20–100 °C.

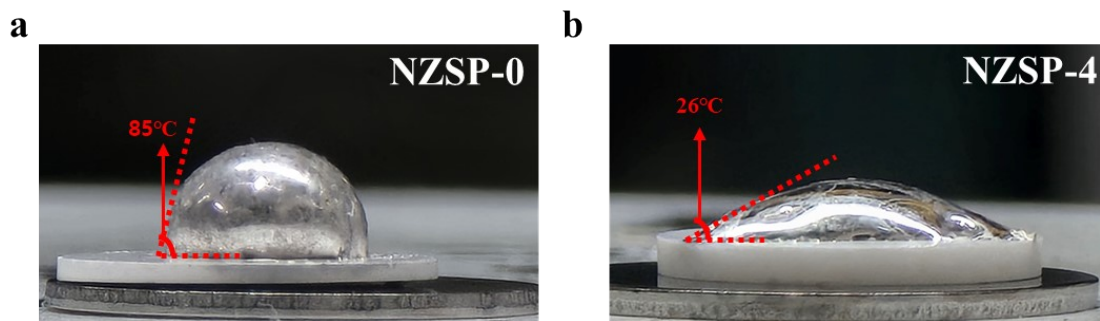

**Fig. S7.** Wettability tests of (a) NZSP-0 and (b) NZSP-4 with molten sodium metal.
